# Supplementary material
Source: publisher figshare collection journal article supplement (https://acs.figshare.com/ndownloader/files/7221158)
Supplement: Supplementary file 1 [file 7221158]

## SUPPORTING INFORMATION

### Adsorption Microcalorimetry of CO<sub>2</sub> in Confined Aminopolymers

Matthew E. Potter,<sup>a</sup> Simon H. Pang,<sup>a</sup> Christopher W. Jones<sup>\*a</sup>

a) School of Chemical & Biomolecular Engineering, Georgia Institute of Technology, 311 Ferst Dr., Atlanta, GA, 30332, USA

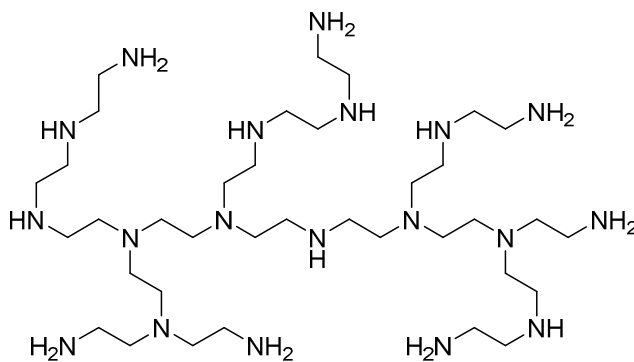

**Figure S1:** Graphical representation of low molecular weight PEI used in this study.

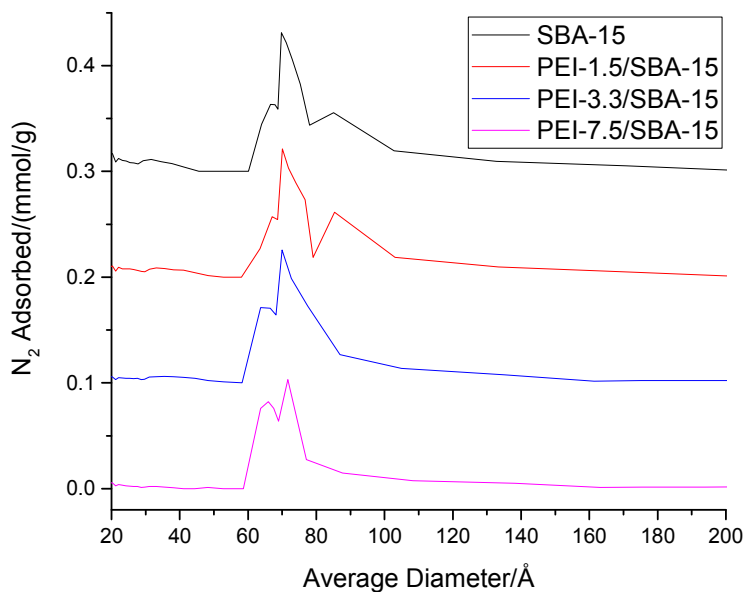

**Figure S2:** Pore size distribution showing primarily pore with diameters between 70 – 80 Å calculated using the BdB-FHH model.

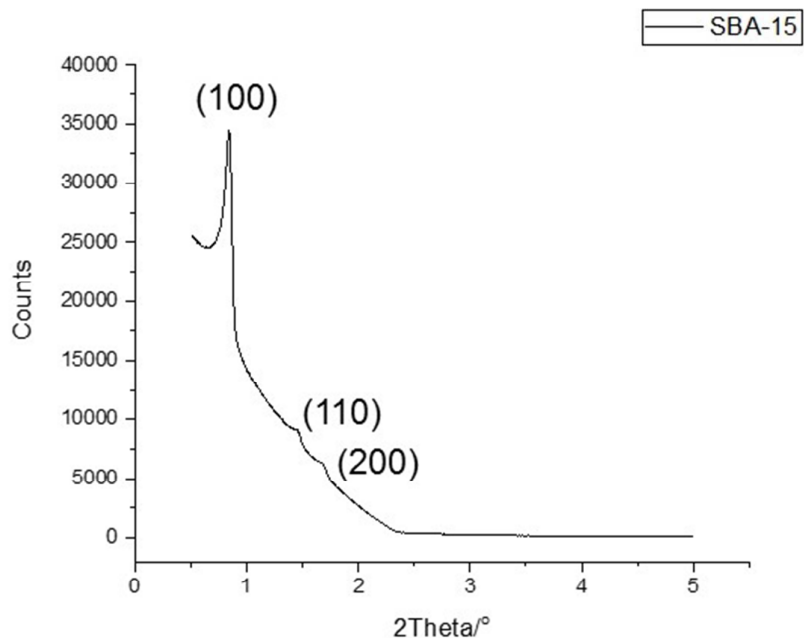

**Figure S3:** Powder XRD pattern confirming the ordered structure of the bare SBA-15.

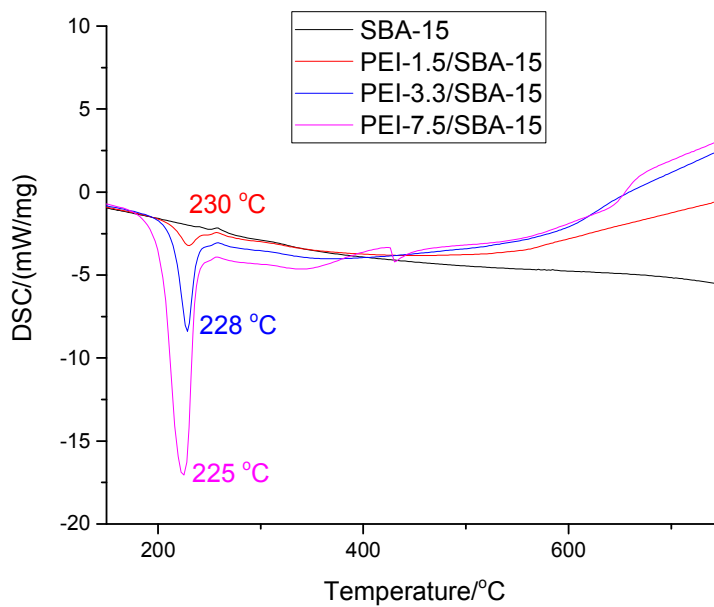

**Figure S4:** Differential scanning calorimetry curves of the thermogravimetric data collected. Labels correspond to the minima of the appropriate samples showing increased PEI leads to a lower minimum in the DSC curve.

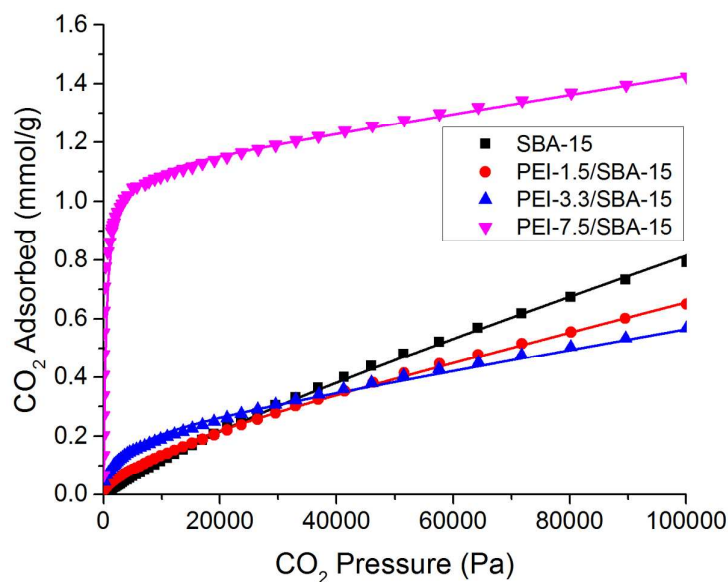

**Figure S5:** Dual-mode sorption fits and parameters fit to CO<sub>2</sub> adsorption isotherms on PEI/SBA-15. Adsorption was fit by a combination of Langmuir and Henry adsorption (coefficients reported in Table S1):

$$Q = S_{max} \frac{k_L P_{CO_2}}{1 + k_L P_{CO_2}} + k_H P_{CO_2}$$

The Langmuir adsorption coefficient ( $k_L$ ) and total number of sites available for chemisorption ( $S_{max}$ ) both increased as PEI loading was increased, indicating that higher loadings of PEI provided additional sites for chemisorption. However, the Henry's law constant ( $k_H$ ) decreased with increased PEI loading, suggesting that physisorption was correlated with available pore volume and surface area (see Table S2).

**Table S1:** Langmuir and Henry coefficients for dual-mode fits shown in Figure S4.

|                | $S_{max}$<br>(mmol g <sup>-1</sup> ) | $k_L$ (Pa <sup>-1</sup> ) | $k_H$ (mmol g <sup>-1</sup> Pa <sup>-1</sup> ) |
|----------------|--------------------------------------|---------------------------|------------------------------------------------|
| SBA-15         | 0.18                                 | $0.42 \times 10^{-4}$     | $6.7 \times 10^{-6}$                           |
| PEI-1.5/SBA-15 | 0.17                                 | $1.3 \times 10^{-4}$      | $5.0 \times 10^{-6}$                           |
| PEI-3.3/SBA-15 | 0.22                                 | $3.5 \times 10^{-4}$      | $3.5 \times 10^{-6}$                           |
| PEI-7.5/SBA-15 | 1.1                                  | $22 \times 10^{-4}$       | $3.2 \times 10^{-6}$                           |

**Table S2:** Henry coefficients normalized for surface area and pore volume.

|                | Surface<br>area (m <sup>2</sup> g <sup>-1</sup> ) | Pore volume<br>(cm <sup>3</sup> g <sup>-1</sup> ) | k <sub>H</sub> (mmol<br>g <sup>-1</sup> Pa <sup>-1</sup> ) | k <sub>H</sub> /SA (mmol<br>Pa <sup>-1</sup> m <sup>-2</sup> ) | k <sub>H</sub> /PV (mmol<br>Pa <sup>-1</sup> cm <sup>-3</sup> ) |
|----------------|---------------------------------------------------|---------------------------------------------------|------------------------------------------------------------|----------------------------------------------------------------|-----------------------------------------------------------------|
| SBA-15         | 789                                               | 0.93                                              | 6.7 × 10 <sup>-6</sup>                                     | 8.5 × 10 <sup>-9</sup>                                         | 7.2 × 10 <sup>-6</sup>                                          |
| PEI-1.5/SBA-15 | 512                                               | 0.77                                              | 5.0 × 10 <sup>-6</sup>                                     | 9.8 × 10 <sup>-9</sup>                                         | 6.5 × 10 <sup>-6</sup>                                          |
| PEI-3.3/SBA-15 | 361                                               | 0.65                                              | 3.5 × 10 <sup>-6</sup>                                     | 9.7 × 10 <sup>-9</sup>                                         | 5.4 × 10 <sup>-6</sup>                                          |
| PEI-7.5/SBA-15 | 236                                               | 0.51                                              | 3.2 × 10 <sup>-6</sup>                                     | 14 × 10 <sup>-9</sup>                                          | 6.3 × 10 <sup>-6</sup>                                          |

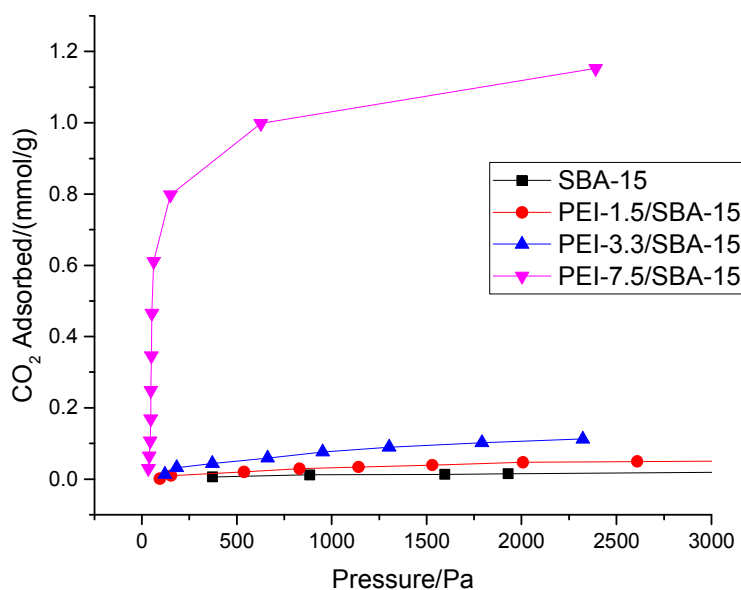

**Figure S6:** CO<sub>2</sub> adsorbed as a function CO<sub>2</sub> pressure for the tandem volumetric uptake - microcalorimetry experiments.
